# Supplementary material for: Cathepsin K cleavage of angiopoietin-2 creates detrimental Tie2 antagonist fragments in sepsis
Source: JCI journal article supplement (doi:10.1172/jci174135), 2025-03-03

Full unedited membrane for Figure 1E

lanes used for the figure

---

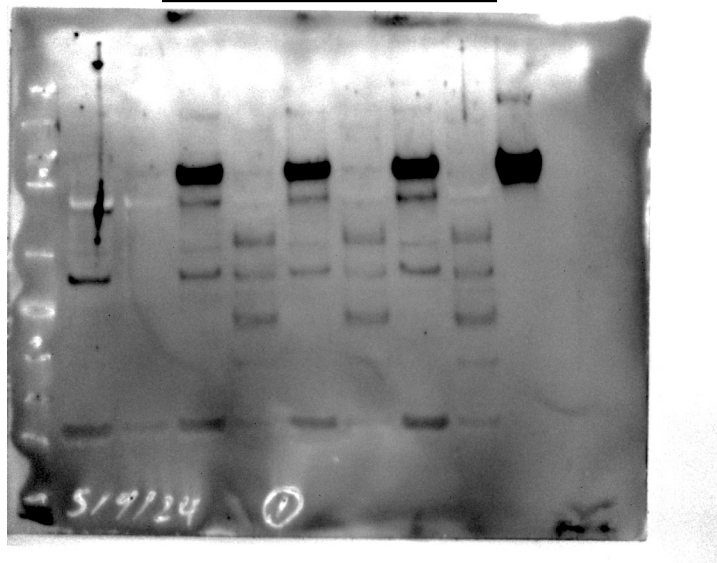

lanes used for the figure

---

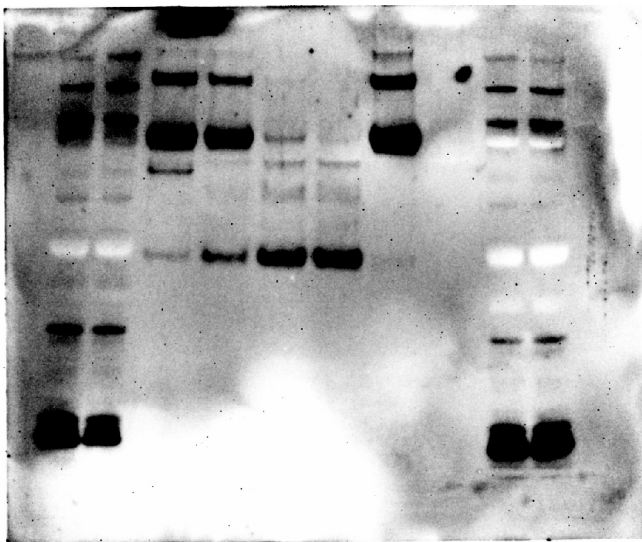

lanes used for the figure

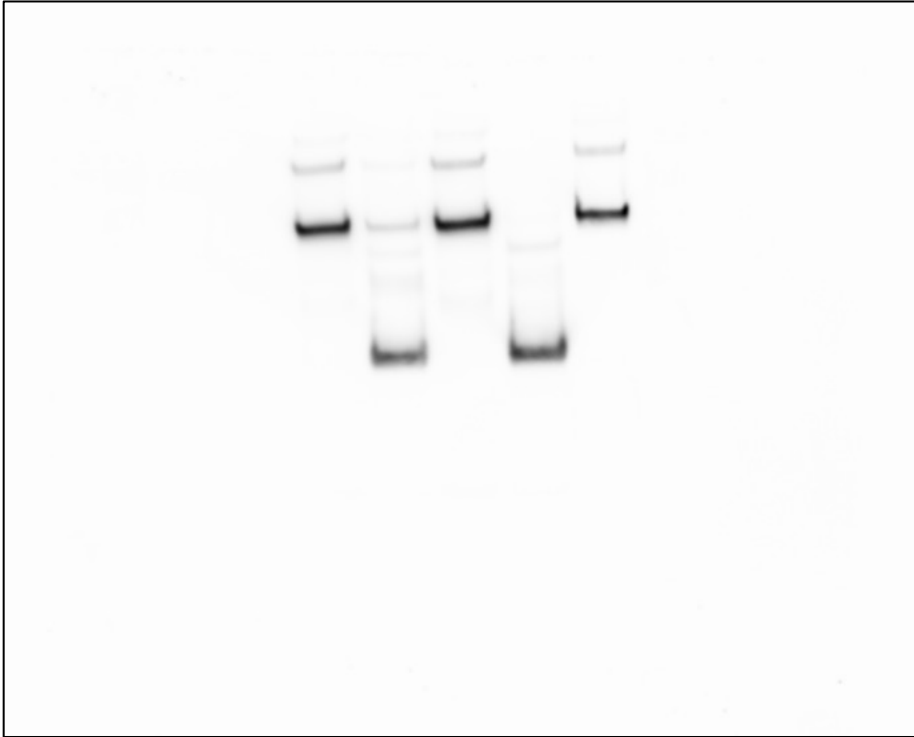

Full unedited membrane for Figure 2A

lane used for the figure

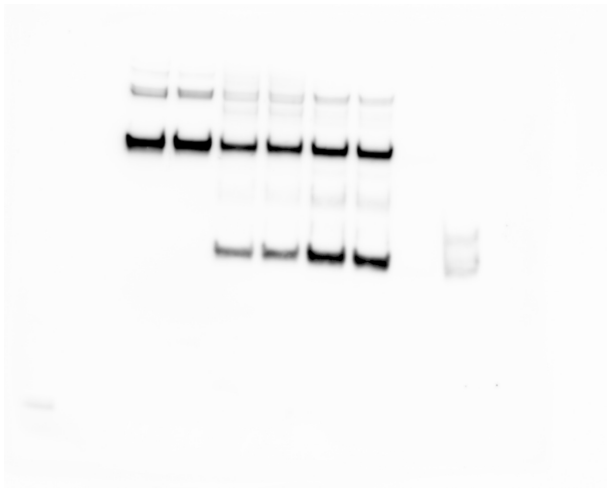

lane used for the figure

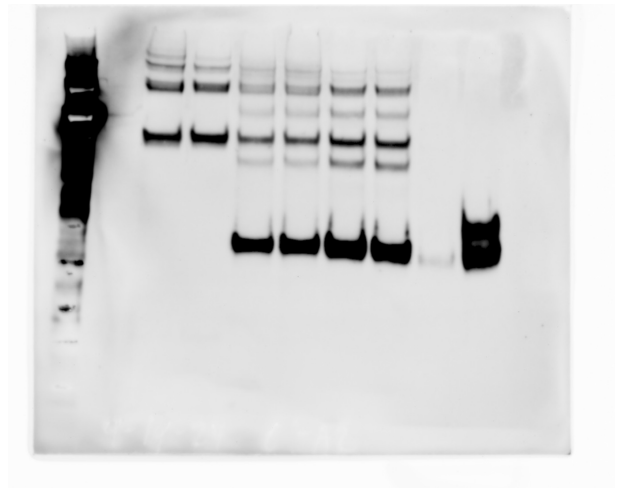

Full unedited membrane for Figure 2B

lanes used for the figure

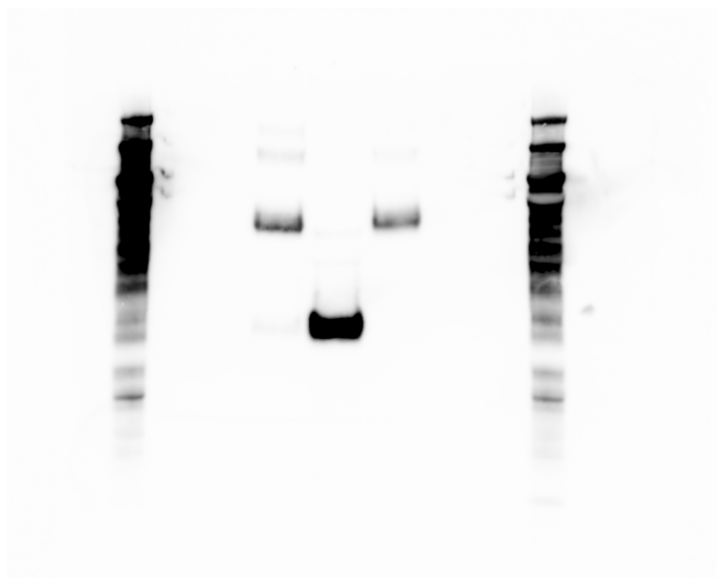

# Full unedited film for Figure 2D

lanes used for the figure

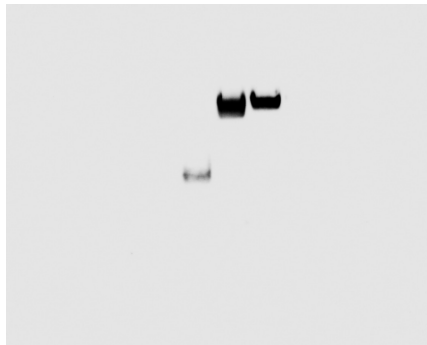

This Figure is used in Supplemental  
Figure 6J, C'-ANGPT2 lanes, too

Full unedited film for Figure 2G

lanes used for the figure,  
ANGPT2 left two lanes

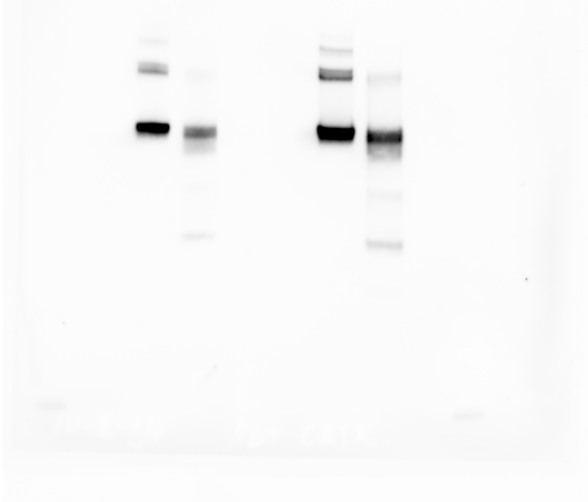

lanes used for the figure,  
ANGPT2 right two lanes

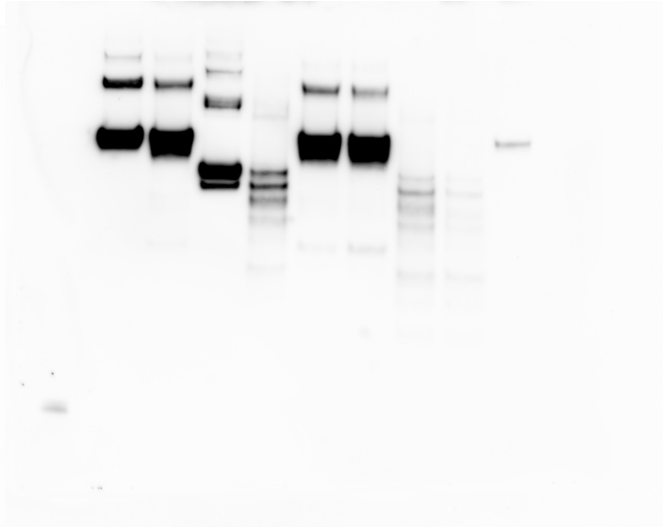

Full unedited film for Figure 2G

lanes used for the figure, ANGPT2  
(55S-496F) left two lanes

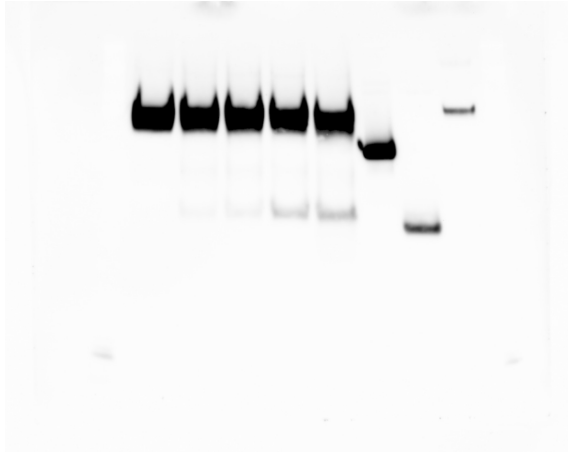

lanes used for the figure, ANGPT2  
(55S-496F) right two lanes

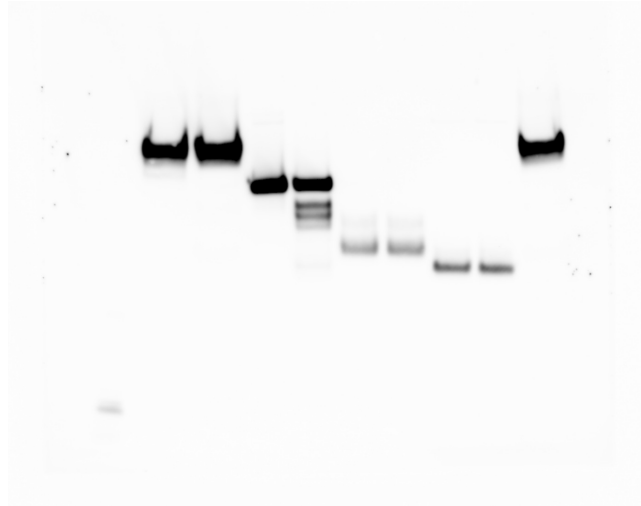



Full unedited film for Figure 2G

lanes used for the figure, ANGPT2  
(253E-496F)

---

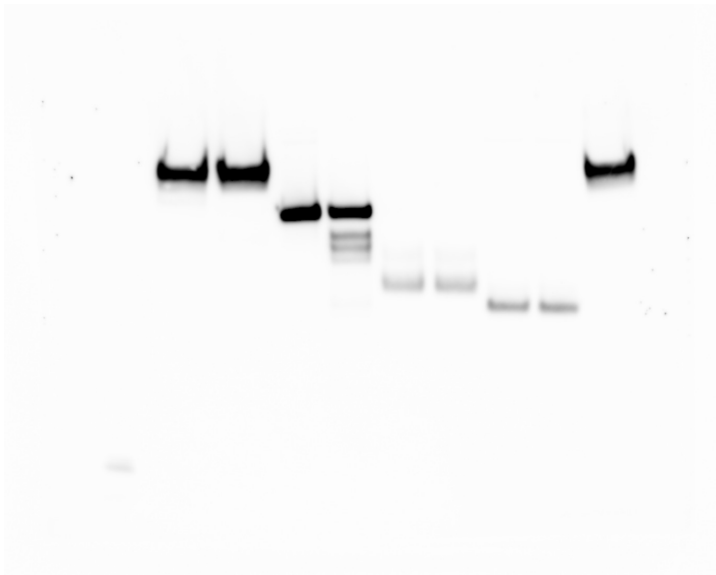

Full unedited membrane for Figure 3A

lanes used for the figure

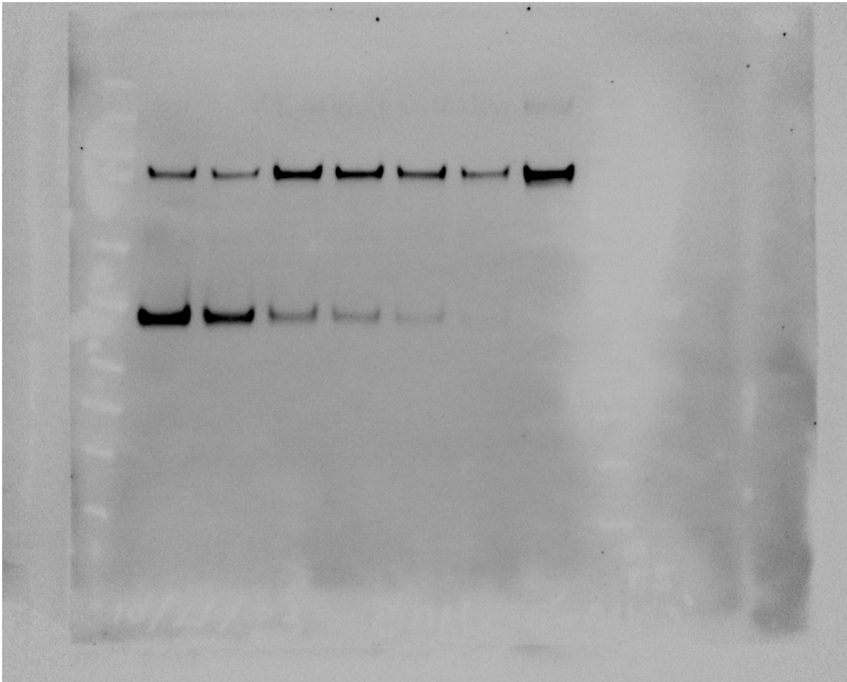

Full unedited film for Figure 3B

lanes used for the figure

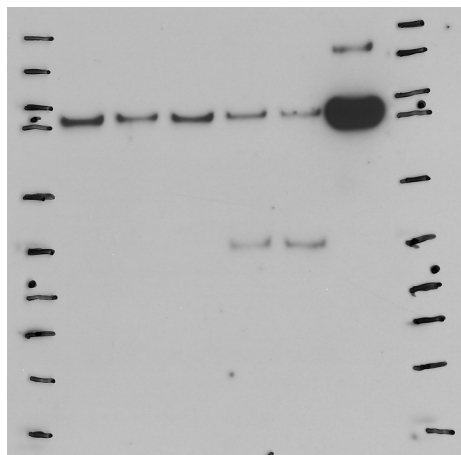

Full unedited membrane for Figure 3C

lanes used for the figure

---

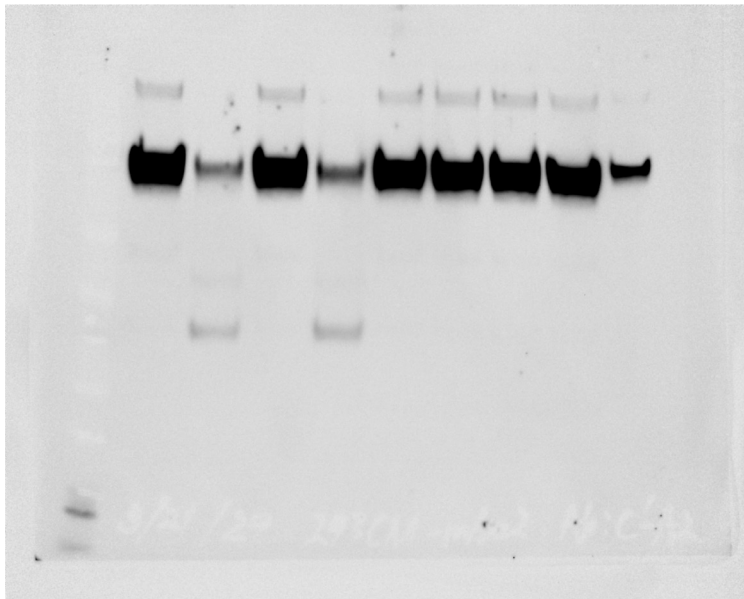

lanes used for the figure,  
left side, Reduced condition

---

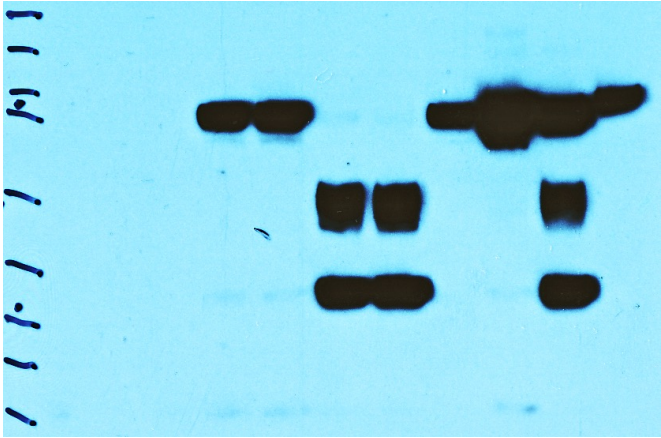

lanes used for the figure, right  
side, Non-reduced condition

---

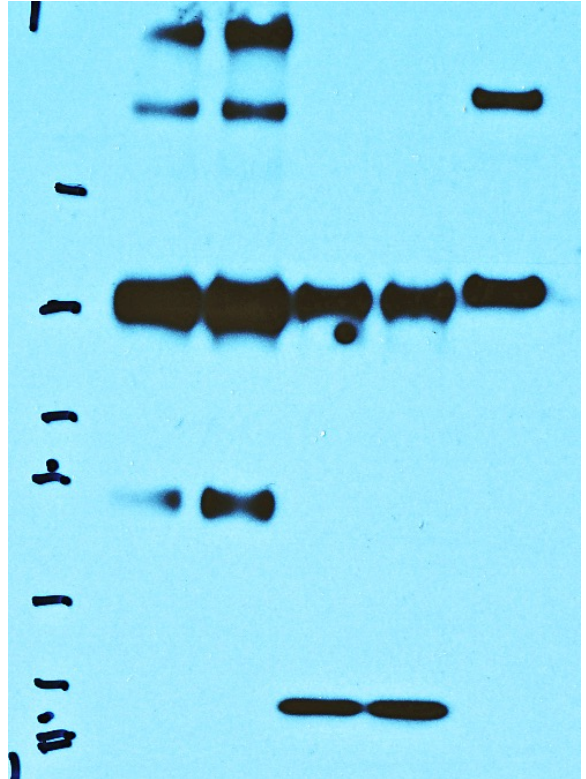

lanes used for the figure, pAKT Ab,  
the lanes were run on the same gel but were noncontiguous

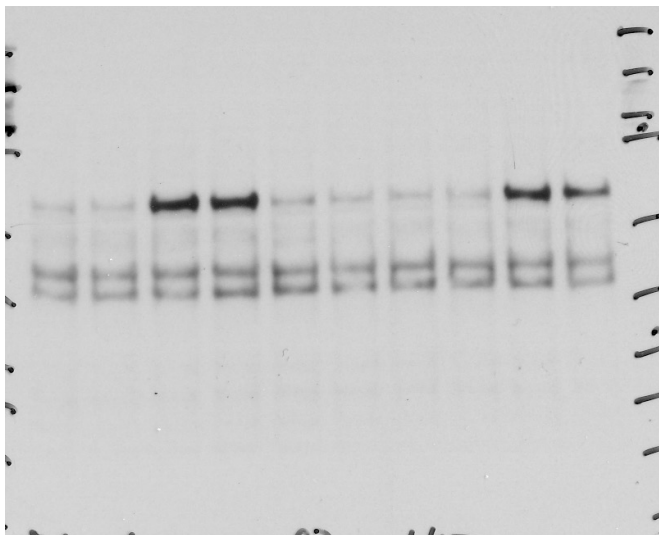

lanes used for the figure, AKT Ab,  
the lanes were run on the same gel but were noncontiguous

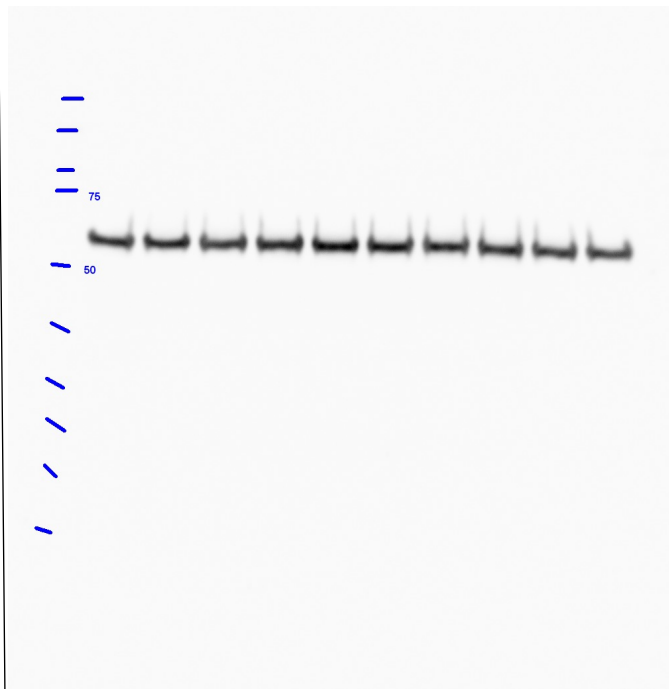

lanes used for the figure, pAKT

---

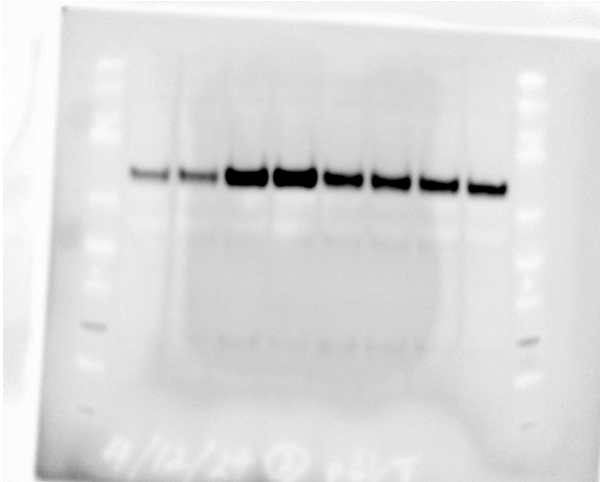

lanes used for the figure, AKT

---

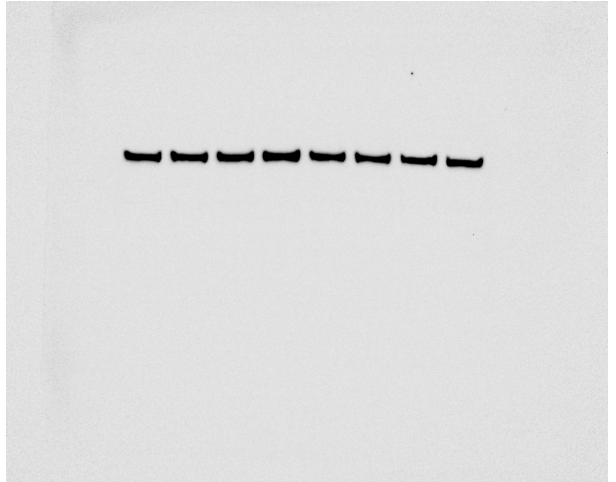

Full unedited membrane for Figure 6A

lanes used for the figure

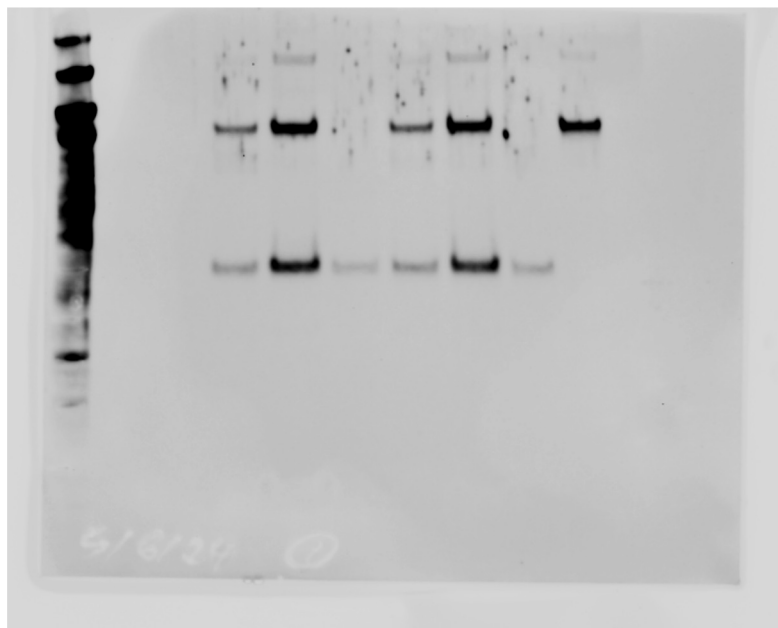



lanes used for the figure, ANGPT2

---

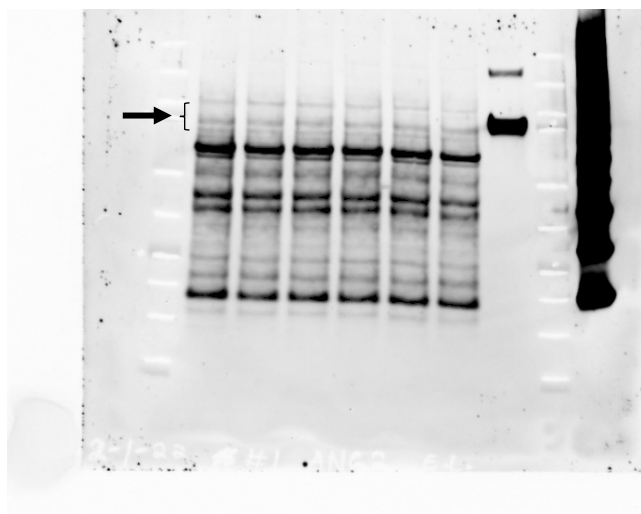

lanes used for the figure, ACTB

---

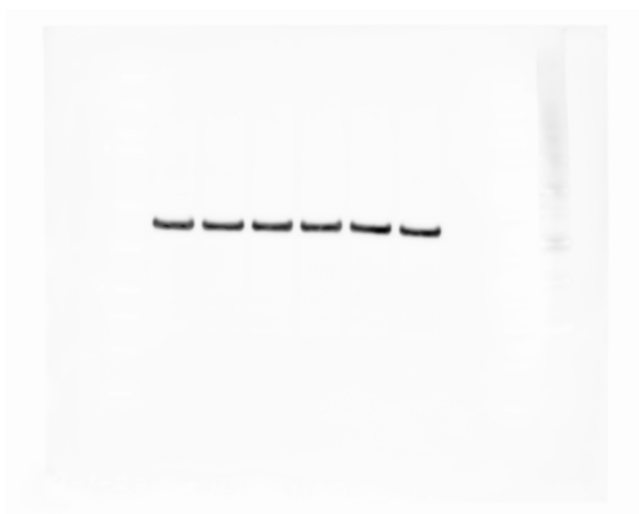

Full unedited membranes for Supplemental Figure 1C

lanes used for the figure, Tie2

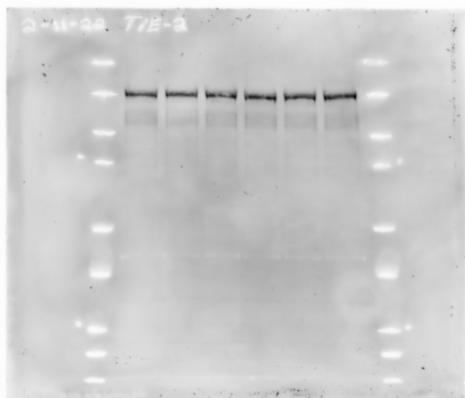

lanes used for the figure, ACTB

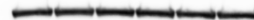

Full unedited membrane for Supplemental Figure 1D

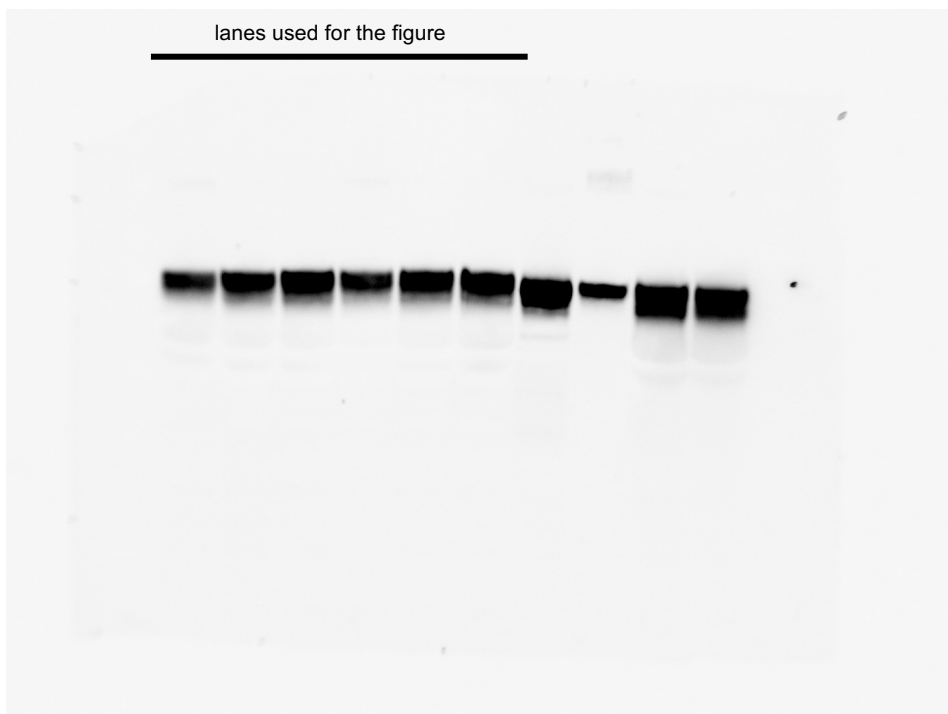

Full unedited membrane for Supplemental Figure 1E

lanes used for the figure

---

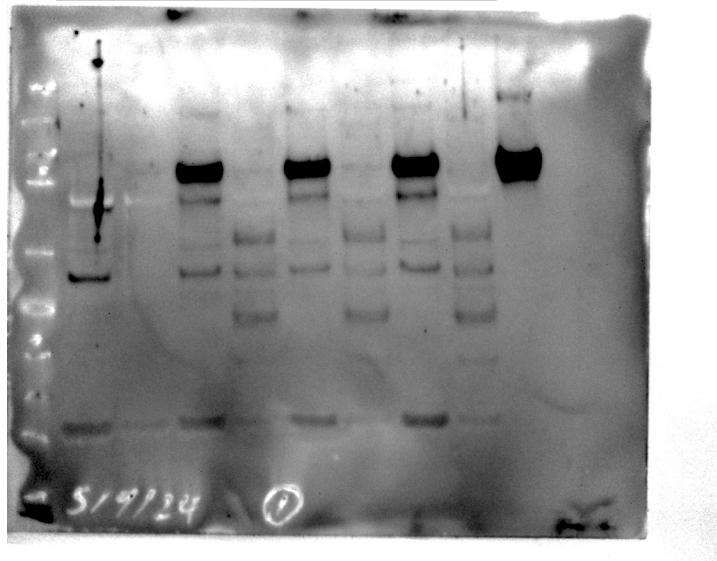

Full unedited membrane for Supplemental Figure2A

lanes used for the figure

---

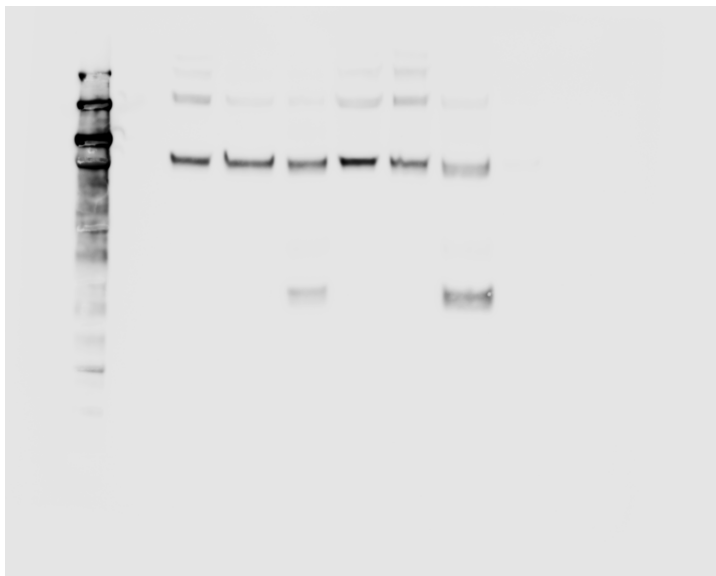

lanes used for the figure

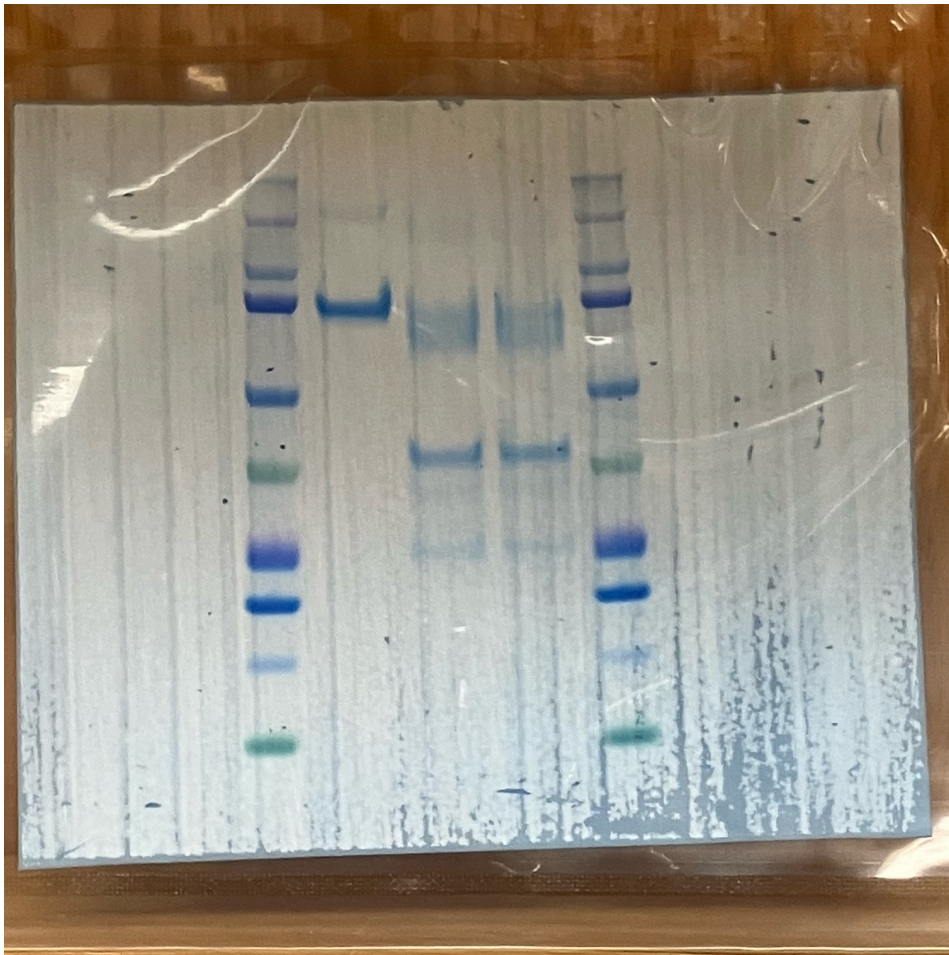

lanes used for the figure

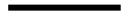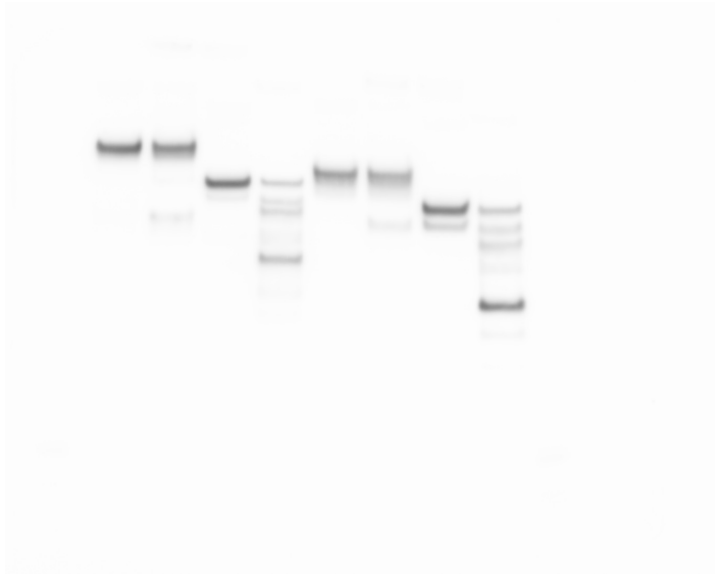

lanes used for the figure, sTie1

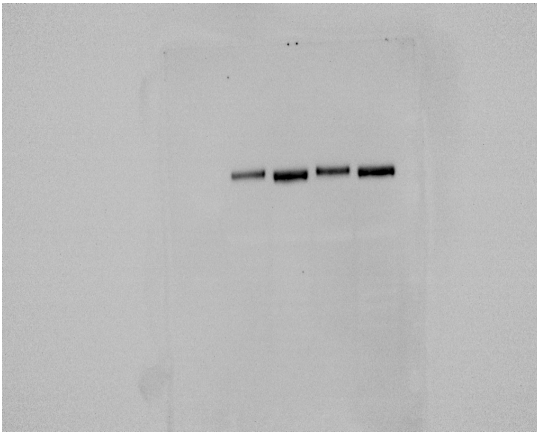

lanes used for the figure, sTie2

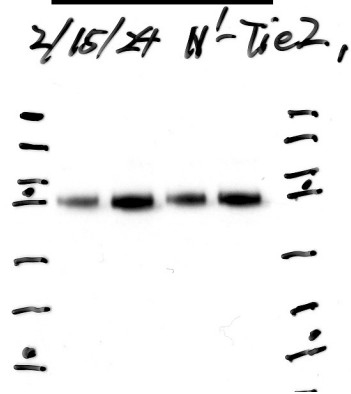



Full unedited membrane for Supplemental Figure 5

lane used for the figure, CM-Mq<sup>LPS</sup> + rANGPT2

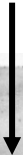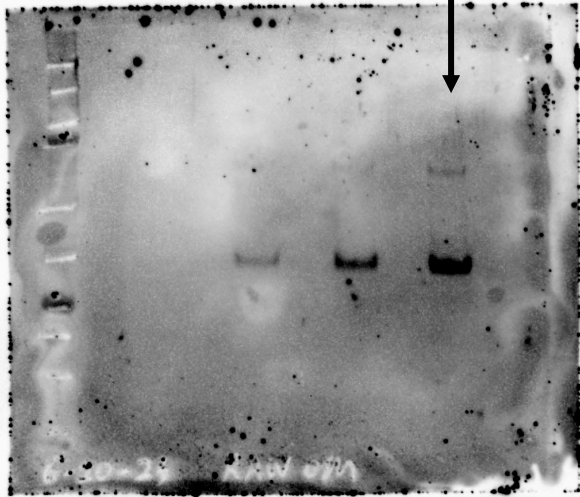

lanes used for the figure, pull-down

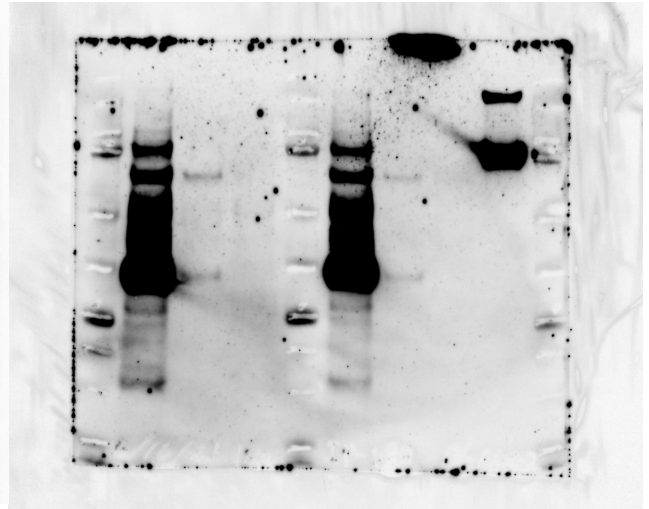

Full unedited membrane for Supplemental Figure 6G

lanes used for the figure

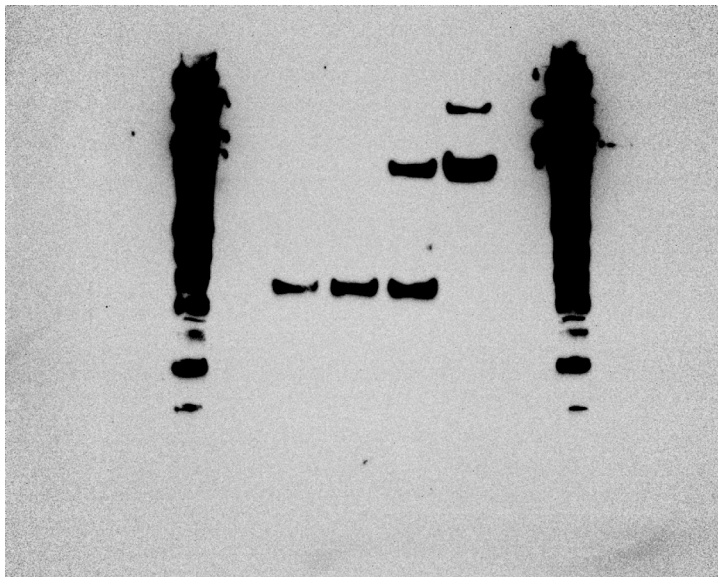

Full unedited membrane for Supplemental Figure 6J

lanes used for the figure, C'-ANGPT2

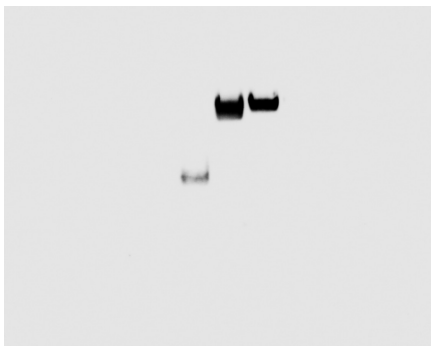

This Figure is also used in Figure 2D

lanes used for the figure, ANGPT2 (404-432)

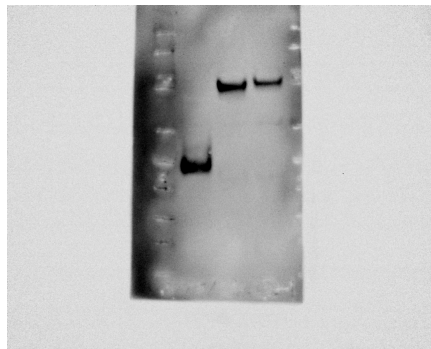

lanes used for the figure, His-tag

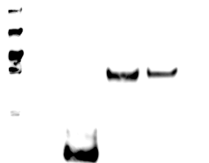

Full unedited membrane for Supplemental Figure 6K, L

lanes used for the figure, His-tag

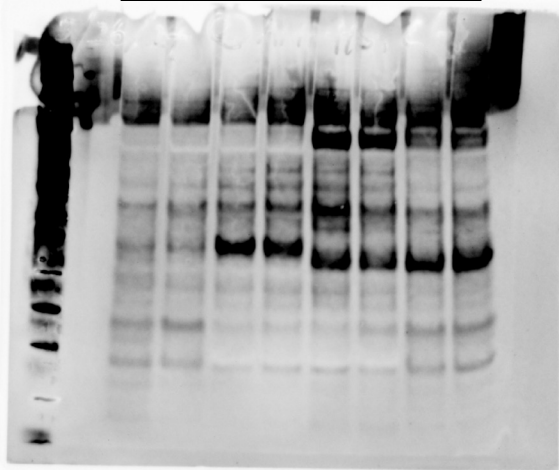

lanes used for the figure,  $\beta$ -actin

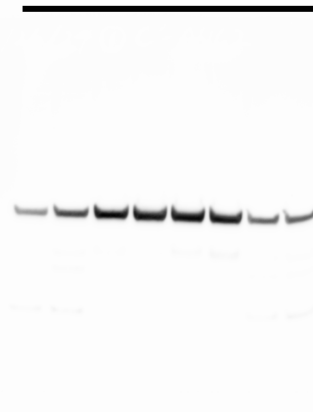

lanes used for the figure

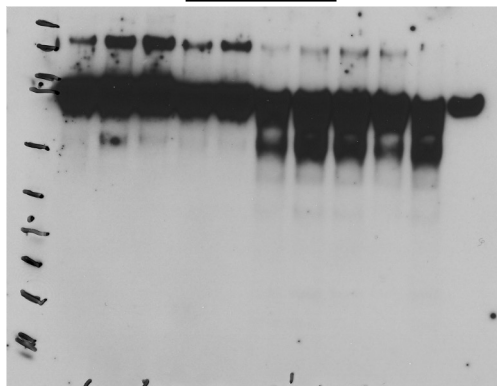

lanes used for the figure

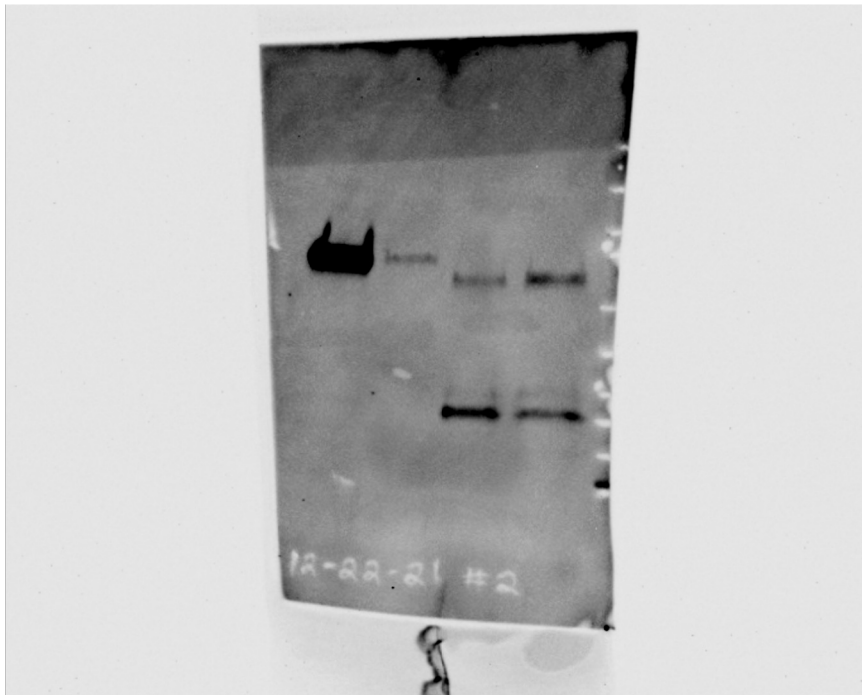

Full unedited membrane for Supplemental Figure 10

lanes used for the figure

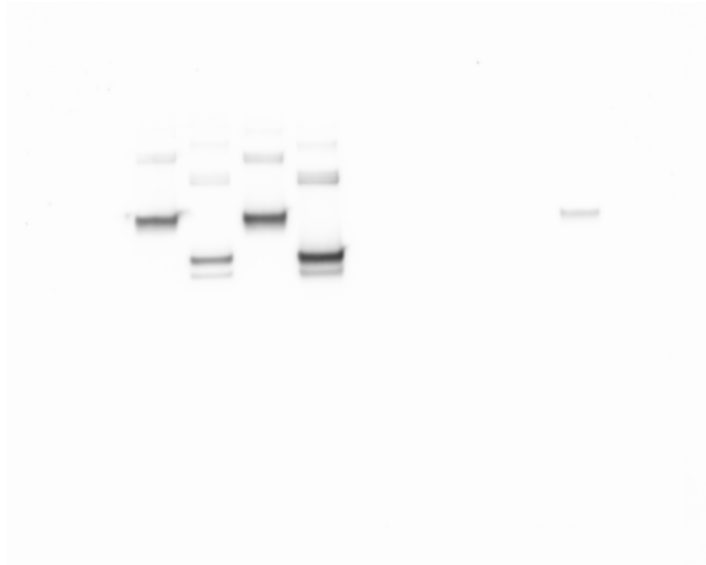

Supplement: sd1 [file 1]
